# Supplementary material for: Co-Evaluation of Plant Leaf Nutrient Concentrations and Resorption in Response to Fertilization under Different Nutrient-Limited Conditions
Source: MDPI journal article supplement (doi:10.3390/d14050385), 2022-05-12
Supplement: s1 [file s1]

# Supplementary Materials for Co-evaluation of plant leaf nutrient concentrations and resorption in response to fertilization under different nutrient-limited conditions

Meixia Zhang <sup>1,2,†</sup>, Leiya Zhang <sup>1,2,†</sup>, Xianyu Yao <sup>1,2</sup>, Jianling Li <sup>1,2,\*</sup> and Qi Deng <sup>1,2,\*</sup>

<sup>1</sup> Key Laboratory of Vegetation Restoration and Management of Degraded Ecosystems, South China Botanical Garden, Chinese Academy of Sciences, Guangzhou 510650, China;

<sup>2</sup> Southern Marine Science and Engineering Guangdong Laboratory (Guangzhou), Guangzhou 510301, China.

\* Correspondence: lijianling@scbg.ac.cn (J.L.) and dengqi@scbg.ac.cn (Q.D.); Tel.: +86-20-87252566

† Meixia Zhang and Leiya Zhang contributed equally to this work.

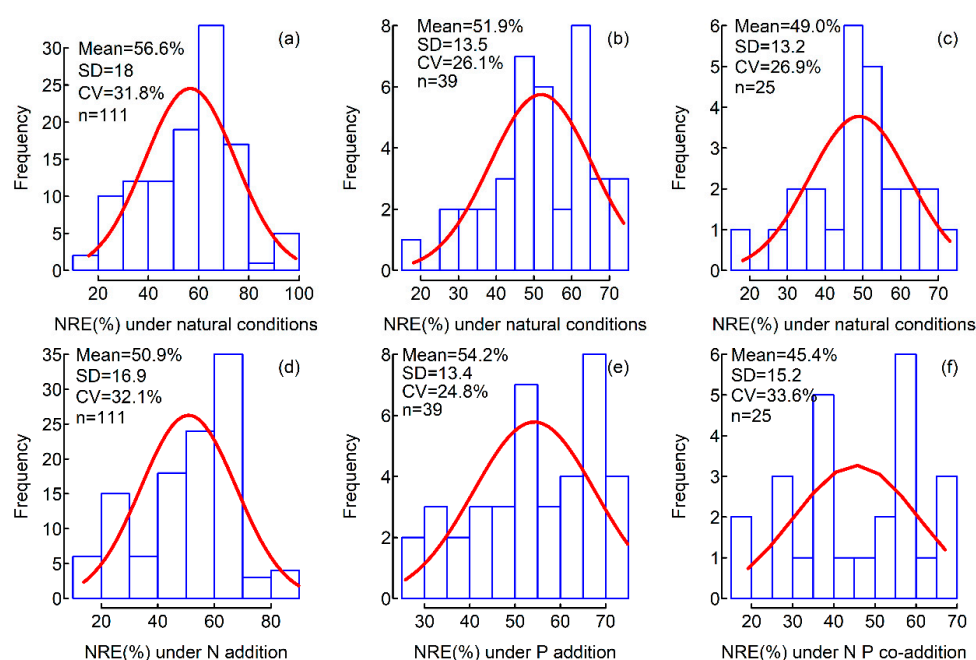

**Figure S1.** Frequency distribution of the change in nitrogen resorption efficiency (NRE) under natural conditions (a) (b) (c); and the corresponding change in NRE under N addition (d), P addition (e) and N P co-addition (f) on a global scale. The red curves were fitted by a Gaussian function.

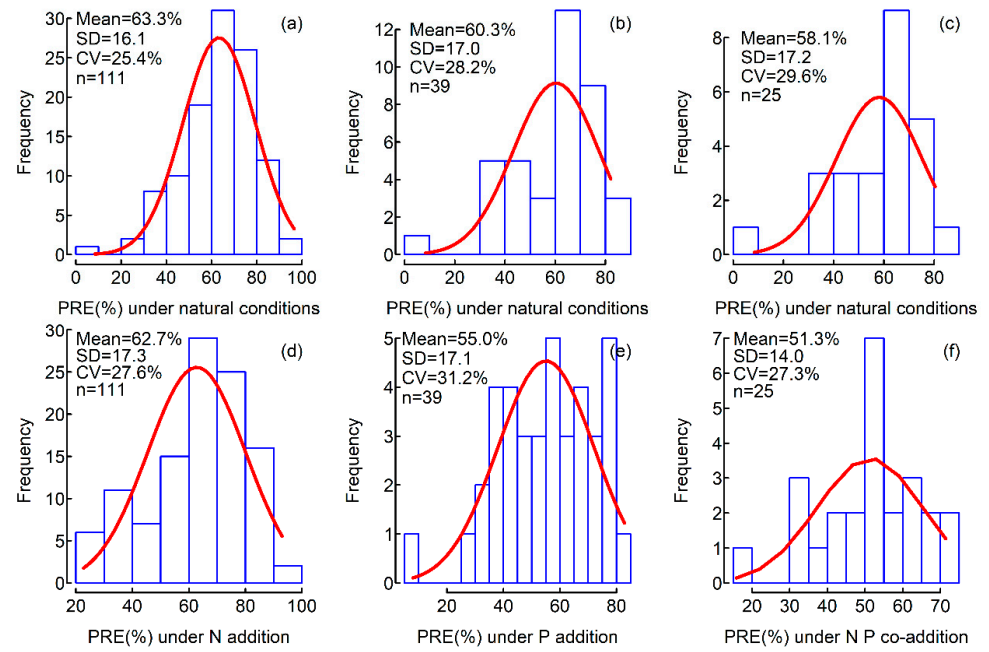

**Figure S2.** Frequency distribution of the change in phosphorus resorption efficiency (PRE) under natural conditions (a) (b) (c); and the corresponding change in PRE under N addition (d), P addition (e) and N P co-addition (f) on a global scale. The red curves were fitted by a Gaussian function.

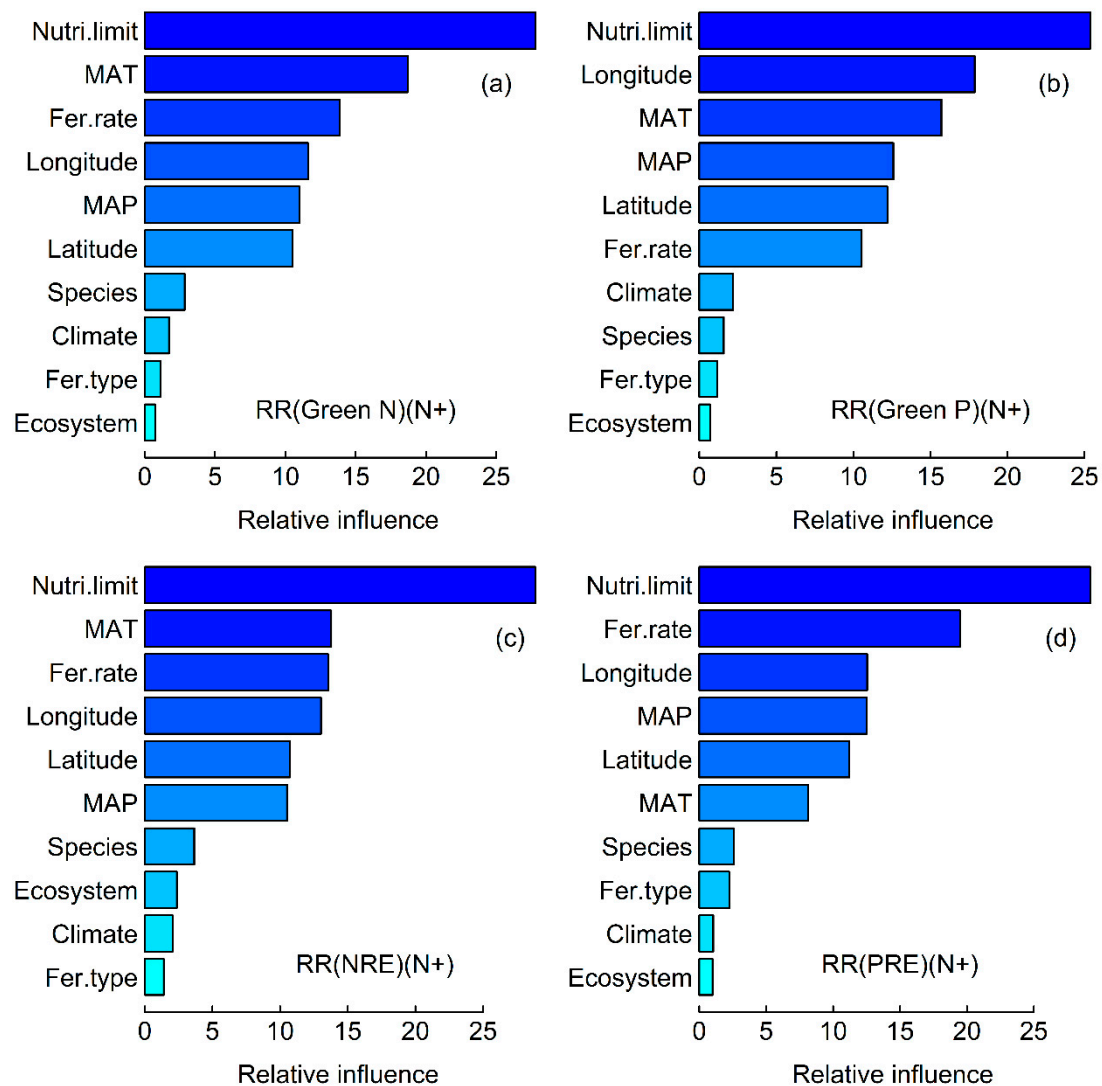

**Figure S3.** The relative influence (%) of the effects of nutri. limit. (nutrient limitation, N-limitation when green leaf N:P < 10, N P co-limitation when 10 < N:P < 20 and P-limitation when N:P > 20), mean annual temperature (MAT), mean annual precipitation (MAP), fer. rate (fertilizer rates), fer. type (fertilizer types), latitude, longitude, species, ecosystem types and climate zones on the RRs (green leaf N and P concentration, NRE and PRE) under N fertilization (N+).

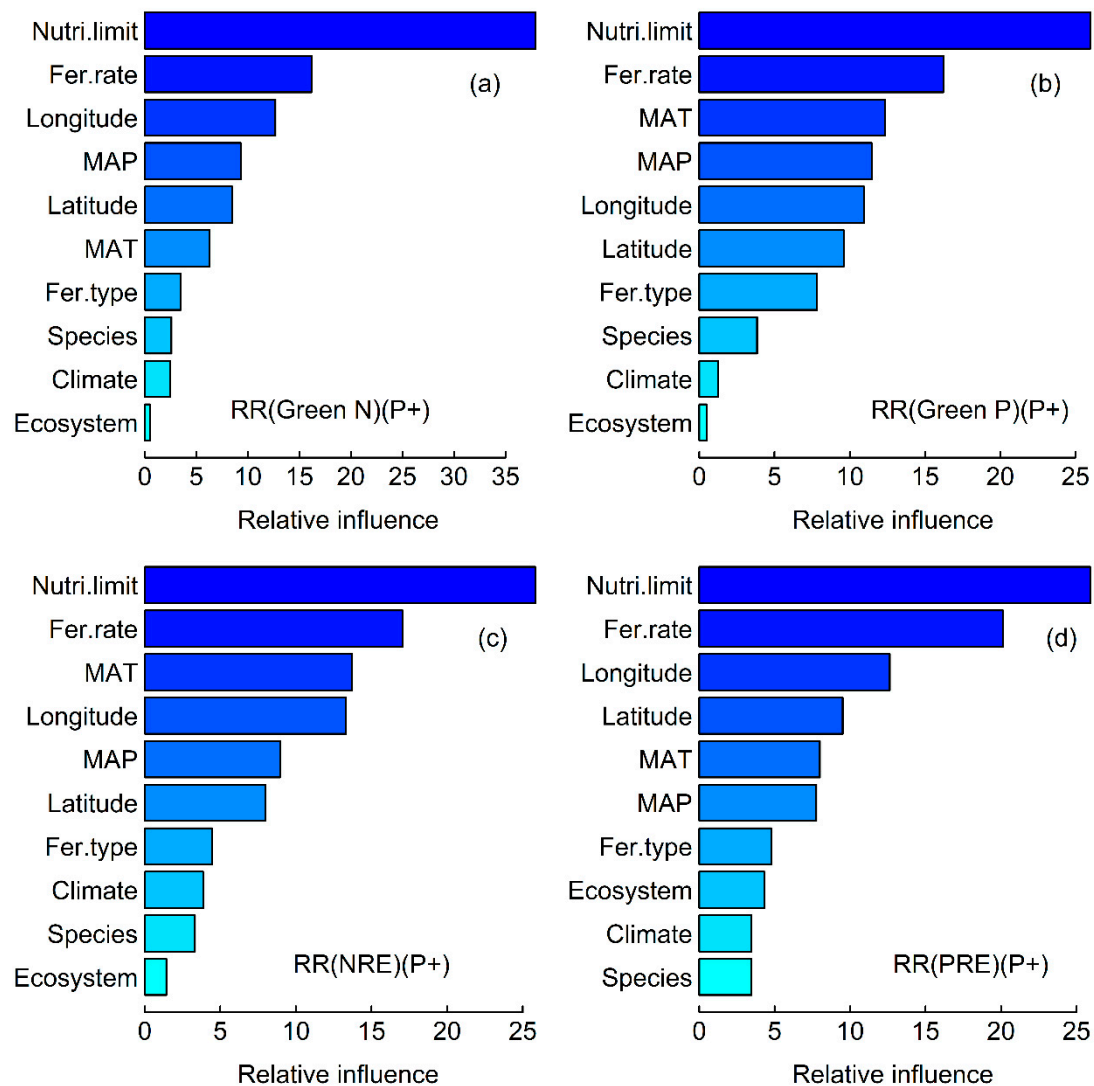

**Figure S4.** The relative influence (%) of the effects of nutri. limit. (nutrient limitation, N-limitation when green leaf N:P < 10, N P co-limitation when 10 < N:P < 20 and P-limitation when N:P > 20), mean annual temperature (MAT), mean annual precipitation (MAP), fer. rate (fertilizer rate), fer. type (fertilizer types), latitude, longitude, species, ecosystem types and climate types on mean the RR (green leaf N and P concentration, NRE and PRE) under P fertilization (P+).
